# Supplementary material for: Phytoremediation with Kenaf (Hibiscus Cannabinus L.) for Cadmium-Contaminated Paddy Soil in Southern China: Translocation, Uptake and Assessment of Cultivars
Source: Research Square preprint supplement (doi:10.21203/rs.3.rs-760873/v1), 2021-08-19
Supplement: Supplementary file 1 [file ec67bd5fd886909748a22da2.docx]

Dear Editor of Environmental Science and Pollution Research:

Thank you for your careful review of the manuscript. We have made the following revision according to the comments of Editor-in-chief.

**Comments：**We have identified that several parts of the manuscript are copied/pasted from previous published publications. Your manuscript exhibits a similarity percentage higher than 30% with already published papers. Please, note that self-plagiarism isn’t allowed. The manuscript contains a number of phrases taken from other published papers, most notably in the 'Introduction' section 1st,3rd paragraph line number (1-5).

**Answer:** According to your suggestion, we modified sentences in the 1st and 3rd paragraph line number (1-5) of 'Introduction' section, as well as 'Material and methods' section, to make the manuscript totally different from previous published publications.

Thank you for your consideration. We look forward to hearing from you.

Sincerely,

Yuan Guo

First author and Corresponding author
